# Supplementary material for: Deciphering Dust Provenance and Transport Pathways Across Northern China's Source-Sink Systems
Source: Copernicus journal article supplement (doi:10.5194/egusphere-2025-856), 2025-03-20

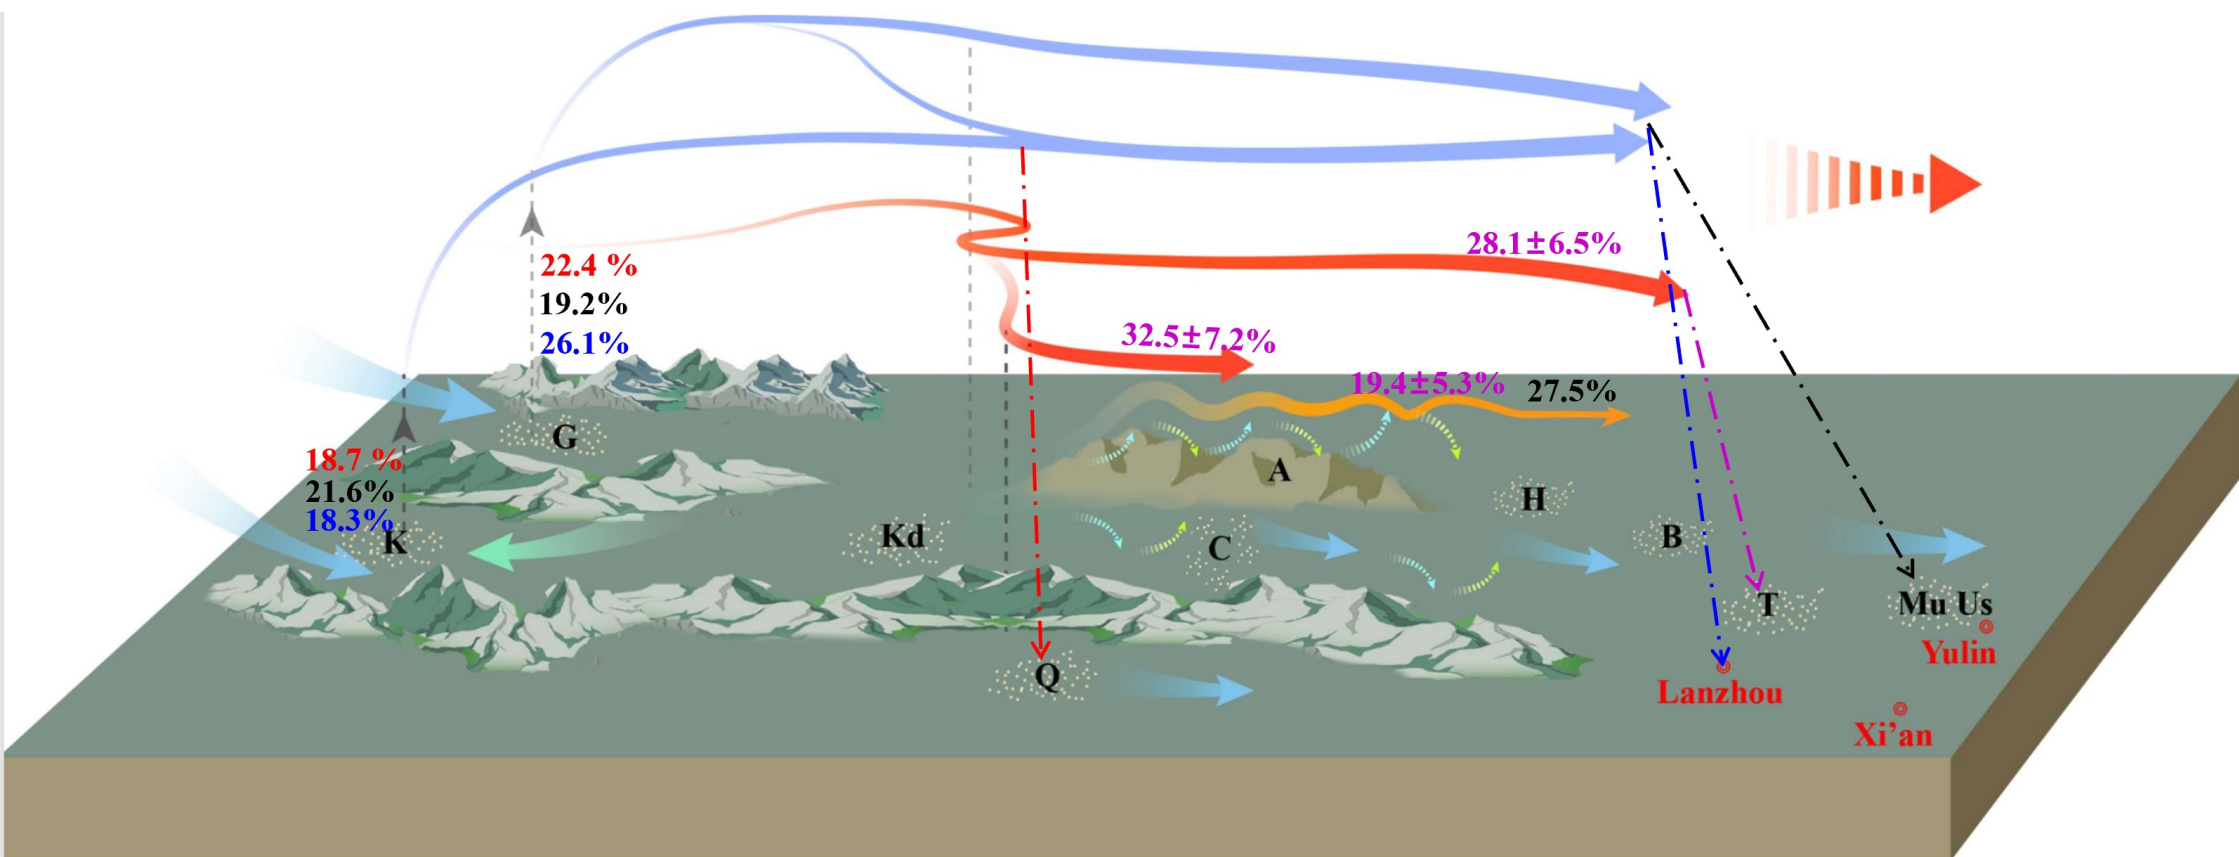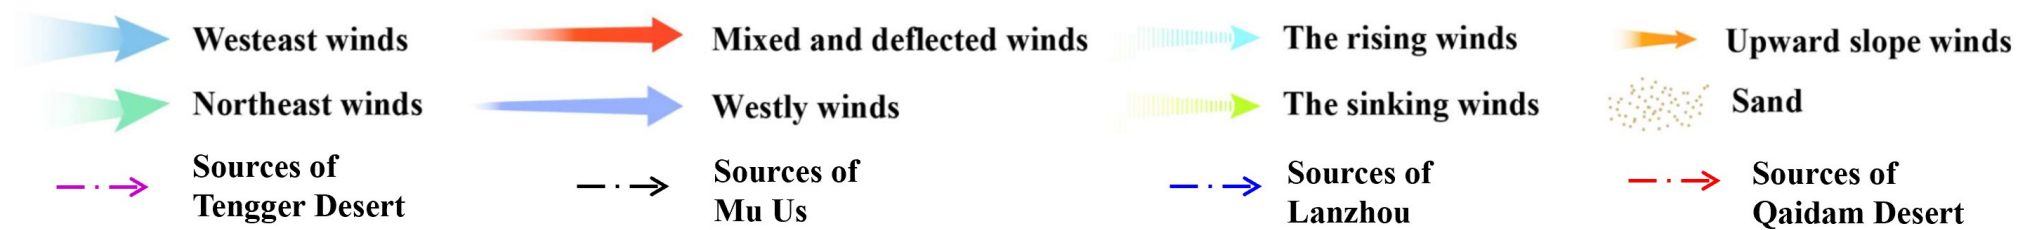

Supplement: Supplementary file [file egusphere-2025-856-AC1-supplement.pdf]
